# Supplementary material for: Nurse-led implementation of the single assessment process in primary care: a descriptive feasibility study
Source: Oxford University Press journal article supplement (doi:10.1093/ageing/afl008), 2006-04-26
Supplement: afl008_Supplementary_Data.zip [file afl008_Supplementary_Data.zip]

**FIGURE appendix 1. Flow chart of recruitment to study and Sherbrooke Questionnaire replies**

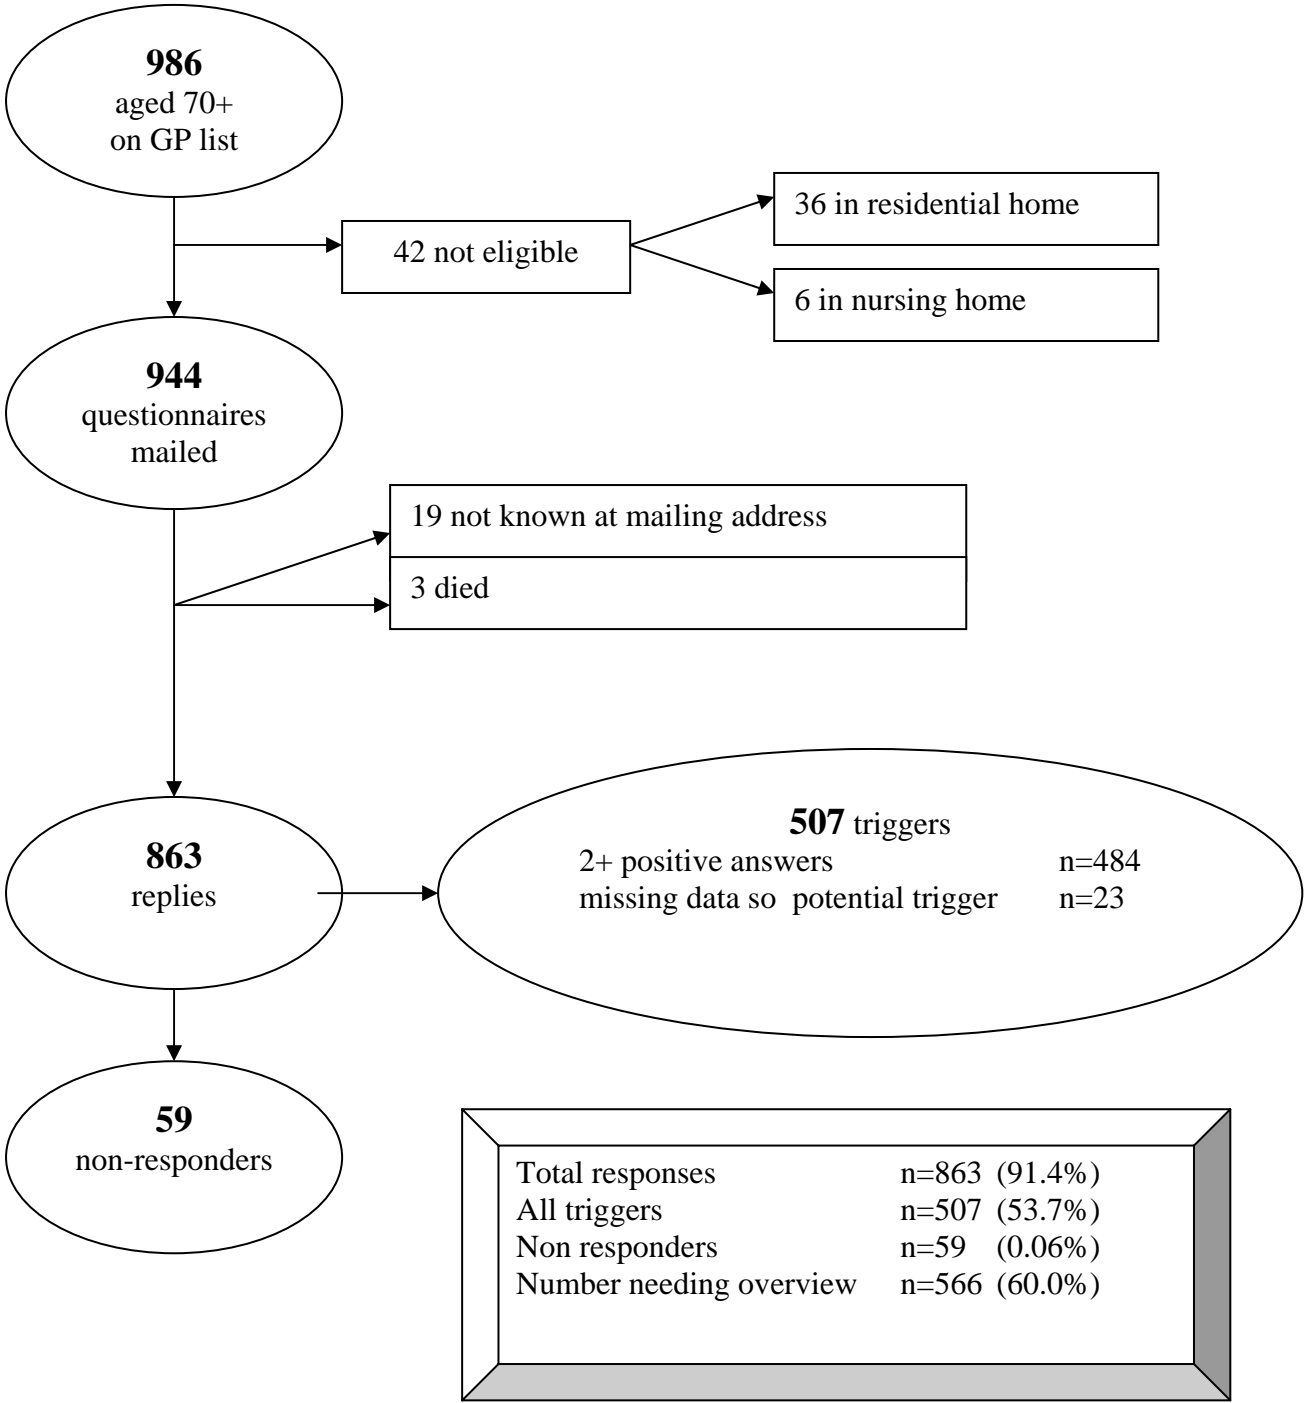

**Table appendix 2 Sherbrooke Questionnaire and affirmative replies**

| <b>Item (affirmative reply)</b>                                   | <b>% positive replies</b> |
|-------------------------------------------------------------------|---------------------------|
| Do you live alone? (No)                                           | 58                        |
| Do you take more than 3 different medications every day? (Yes)    | 39                        |
| Do you use a stick, a frame or a wheel chair to move about? (Yes) | 29                        |
| Do you see well? (No)                                             | 18                        |
| Do you hear well? (No)                                            | 29                        |
| Do you have problems with your memory? (Yes)                      | 23                        |

**Table appendix 3: Patient Characteristics by Sherbrooke Questionnaire Response**

| <b>Score</b>               | <b>No of Replies (%)</b> | <b>% Males</b> | <b>Male Median age</b> | <b>% Females</b> | <b>Female Median age</b> |
|----------------------------|--------------------------|----------------|------------------------|------------------|--------------------------|
| 0                          | 101 (11)                 | 27             | 78                     | 73               | 81                       |
| 1                          | 255 (27.7)               | 44             | 82                     | 56               | 83                       |
| Missing data could score 2 | 23 (2.5)                 | 39             | 81                     | 61               | 83                       |
| 2                          | 219 (23.8)               | 43             | 82                     | 57               | 82                       |
| 3                          | 152 (16.5)               | 43             | 81                     | 57               | 83                       |
| 4                          | 73 (7.9)                 | 37             | 81                     | 63               | 85                       |
| 5                          | 33 (3.6)                 | 42             | 79                     | 58               | 83                       |
| 6                          | 7 (0.8)                  | 86             | 80                     | 14               | 90                       |
| No reply                   | 59 (6.4)                 | 49             | 85                     | 51               | 83                       |
| <b>TOTAL</b>               | <b>922</b>               | <b>42</b>      | <b>85</b>              | <b>58</b>        | <b>85</b>                |
