# Supplementary material for: Nurse-led implementation of the single assessment process in primary care: a descriptive feasibility study
Source: Oxford University Press journal article supplement (doi:10.1093/ageing/afl008), 2006-04-26
Supplement: afl008_Supplementary_Data.zip [file afl008_Supplementary_Data.zip]

Archive with 1 entries (1 files):
- afl008_suppl_data.pdf
